# Supplementary material for: Harnessing copper-palladium alloy tetrapod nanoparticle-induced pro-survival autophagy for optimized photothermal therapy of drug-resistant cancer
Source: PubMed Central journal article supplement (PMC6185906; doi:10.1038/s41467-018-06529-y), 2018-10-12
Supplement: 41467_2018_6529_MOESM1_ESM.pdf [file 41467_2018_6529_MOESM1_ESM.pdf]

# **Supplementary Information**

**Harnessing Copper-Palladium Alloy Tetrapod Nanoparticle-  
induced Pro-survival Autophagy for  
Optimized Photothermal Therapy of Drug-resistant Cancer**

***Zhang et al.***

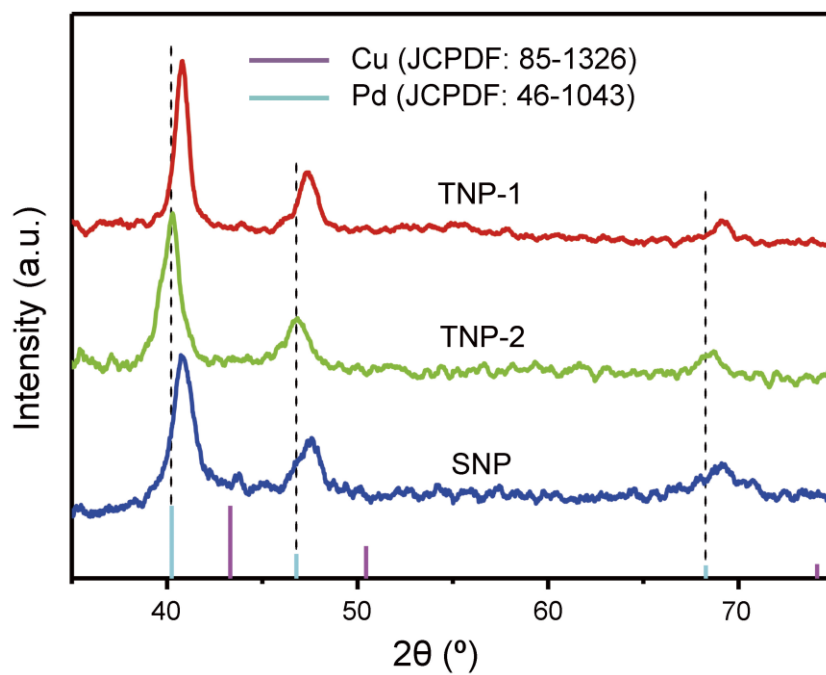

**Supplementary Figure 1.** XRD patterns of CuPd nanocrystals (CuPd TNP-1, TNP-2, SNPs).

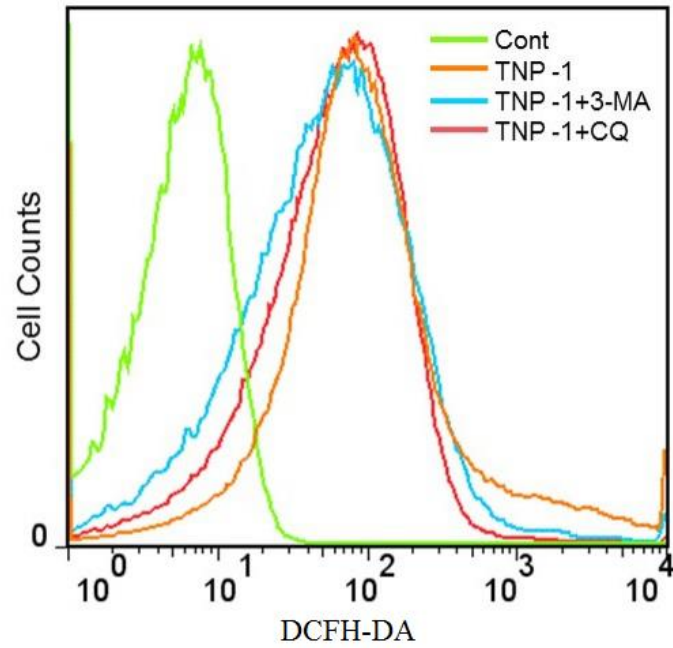

**Supplementary Figure 2.** FACS analysis of intracellular ROS after HeLa cells were treated with PBS (control), TNP-1 (10  $\mu\text{g}/\text{mL}$ ), or TNP-1 in the presence of 3-MA (2.5 mM) or CQ (25 mM) for 24 h.

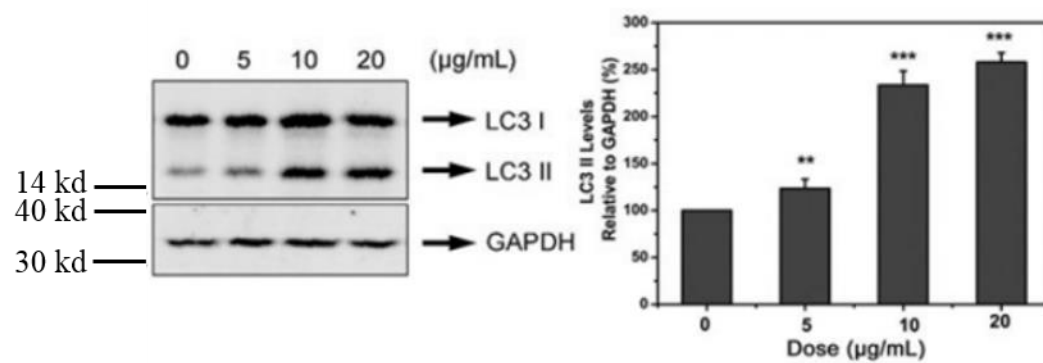

**Supplementary Figure 3.** HeLa cells were treated with the various doses of TNP-1 for 24 h and were subjected to Western blotting with anti-LC3 and GAPDH antibodies. Right panels showed the quantified results. Mean  $\pm$  s.e.m. n = 3. \*\*p < 0.01, \*\*\*p < 0.001.

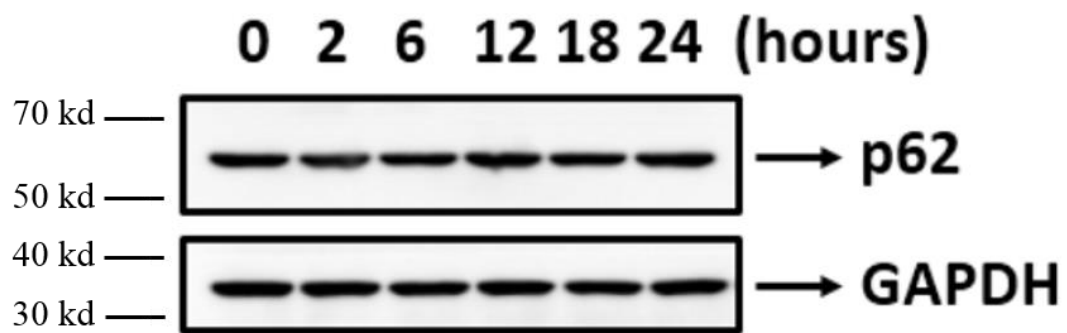

**Supplementary Figure 4.** Western blotting of p62 and GAPDH (served as loading control) in HeLa cells treated with 10  $\mu\text{g/mL}$  CuPd TNP-2 for the various times.

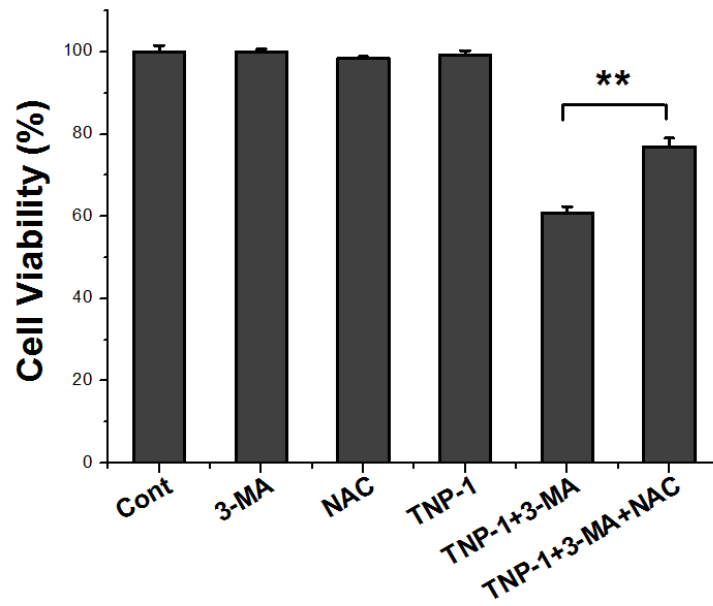

**Supplementary Figure 5.** Cell viability of HeLa cells after treatment for 24 h with the indicated combination. Dosing used: TNP-1: 10  $\mu\text{g}/\text{mL}$ ; 3-MA: 2.5 mM; NAC (N-acetyl cysteine): 25 mM. Mean  $\pm$  s.e.m. n =5, \*\*p < 0.01.

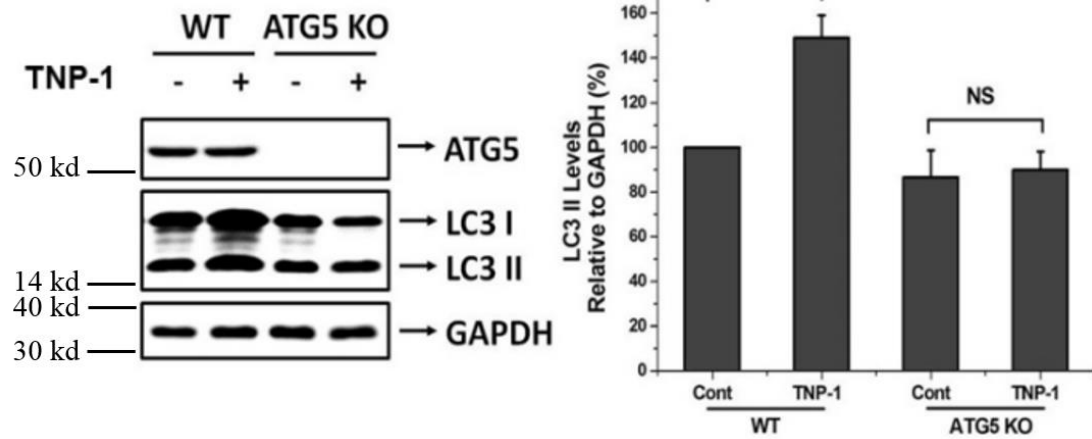

**Supplementary Figure 6.** Wild-type and ATG5 knockout (ATG5 KO) HeLa cells were treated with PBS (cont) or 10  $\mu\text{g}/\text{mL}$  CuPd TNP-1 for 24 h and were subjected to Western blotting with antibodies against ATG5, LC3 or GAPDH. Right panel showed the quantified densitometric analysis results. Mean  $\pm$  s.e.m. n = 3. \*\*\*p < 0.001, NS: not significant.

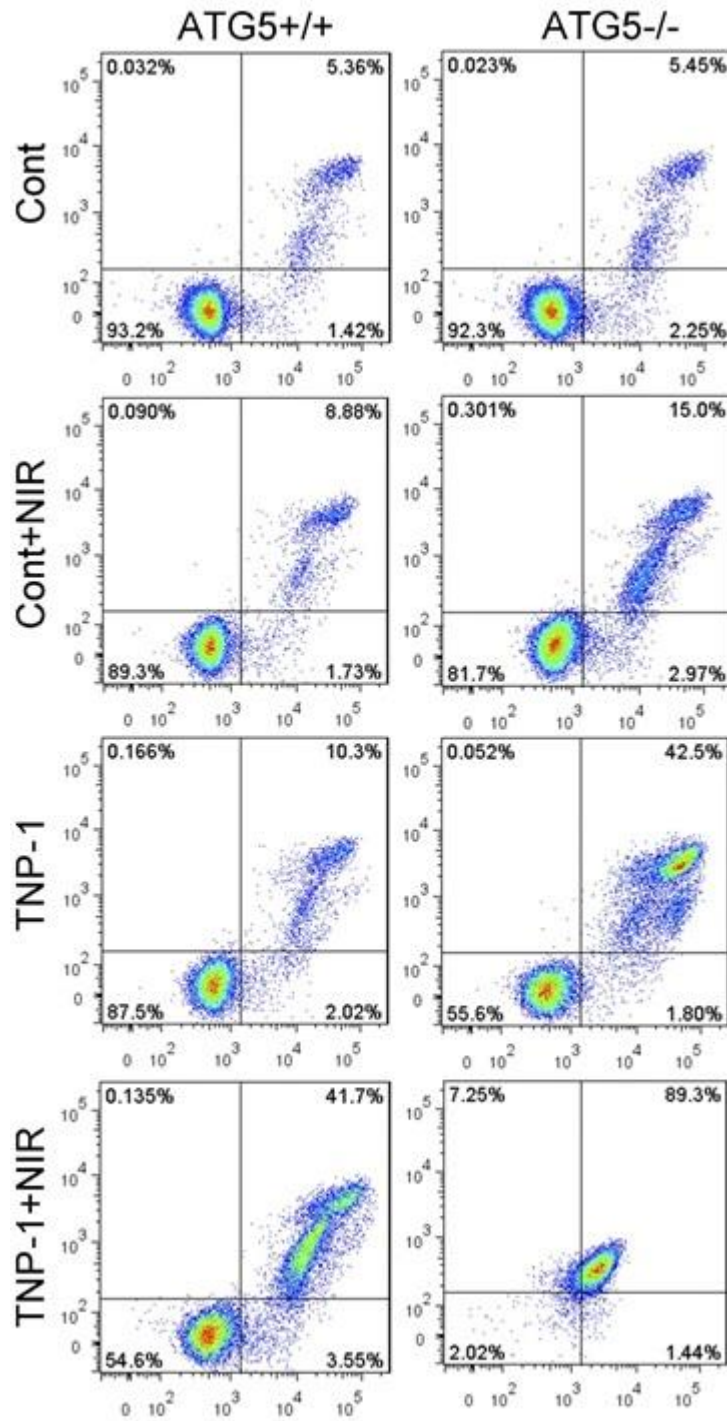

**Supplementary Figure 7.** Annexin-V/PI assay of wild-type and ATG5 knockout (ATG5<sup>-/-</sup>) HeLa cells treated with PBS (control) or 10  $\mu\text{g}/\text{mL}$  CuPd TNP-1 for 24 h in the presence or absence of irradiation by 808-nm NIR laser at a power density of 1  $\text{W}/\text{cm}^2$  for 3 min. Mean  $\pm$  s.e.m.  $n \geq 5$ .



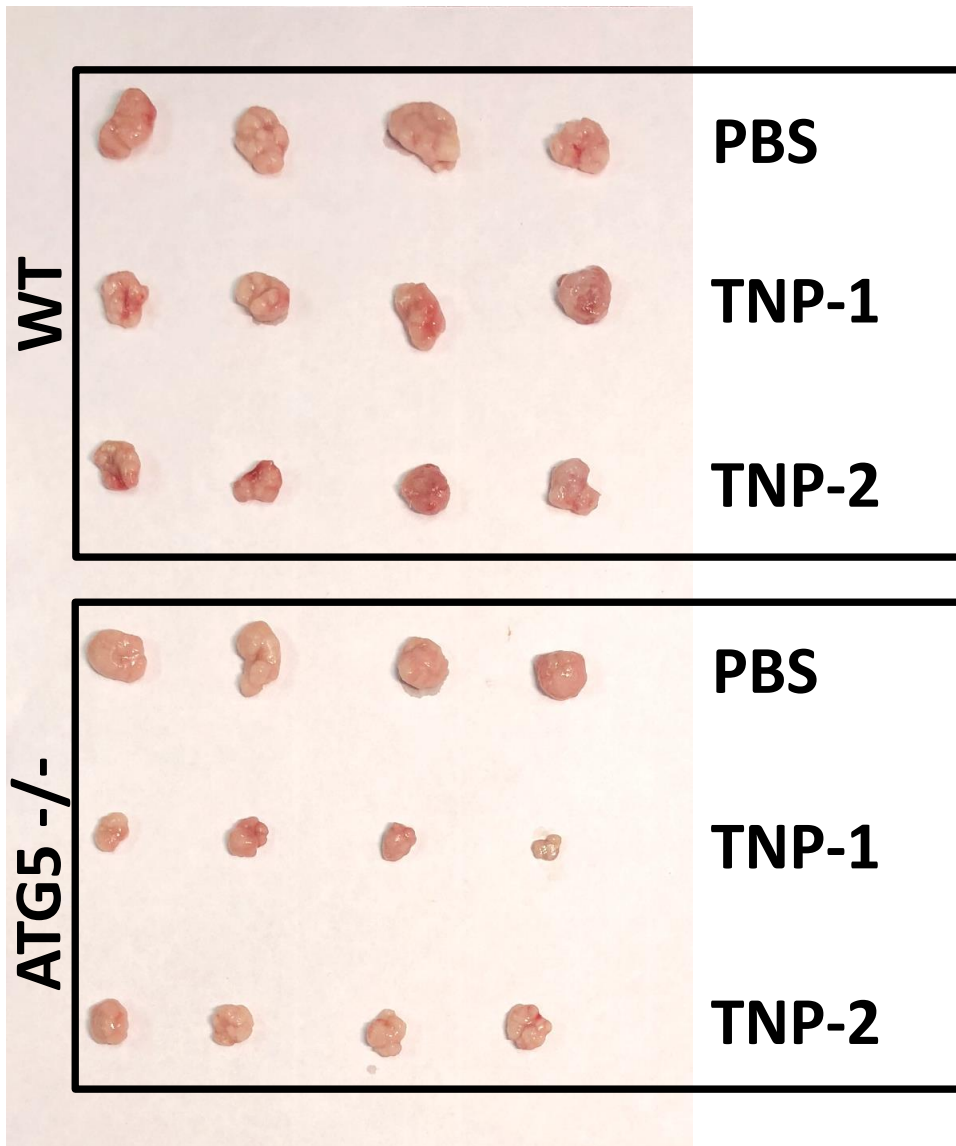

**Supplementary Figure 8.** Photographs of the excised tumors, after the 15-day PTT treatment regimen, in NOD/SCID mice harboring wild-type and ATG5 knock out HeLa tumors.

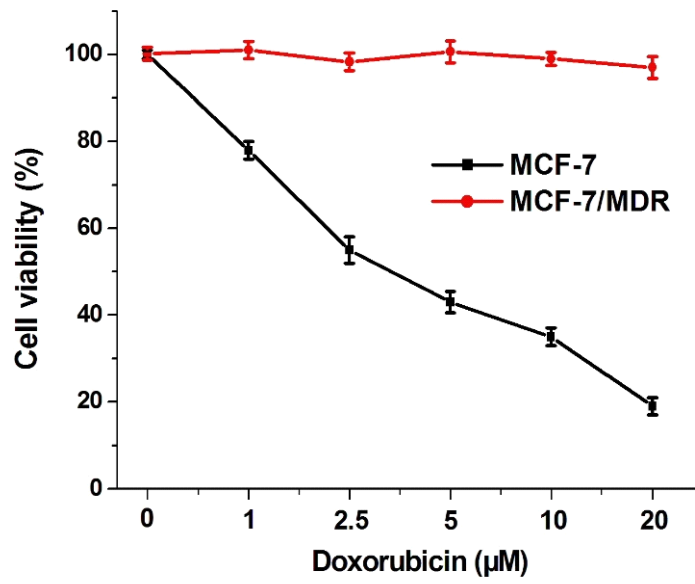

**Supplementary Figure 9.** Cell viability of regular and drug-resistant MCF-7 cells after treatment with different doses of doxorubicin (DOX) for 24 as determined by MTT assay. Mean  $\pm$  s.e.m. n =5

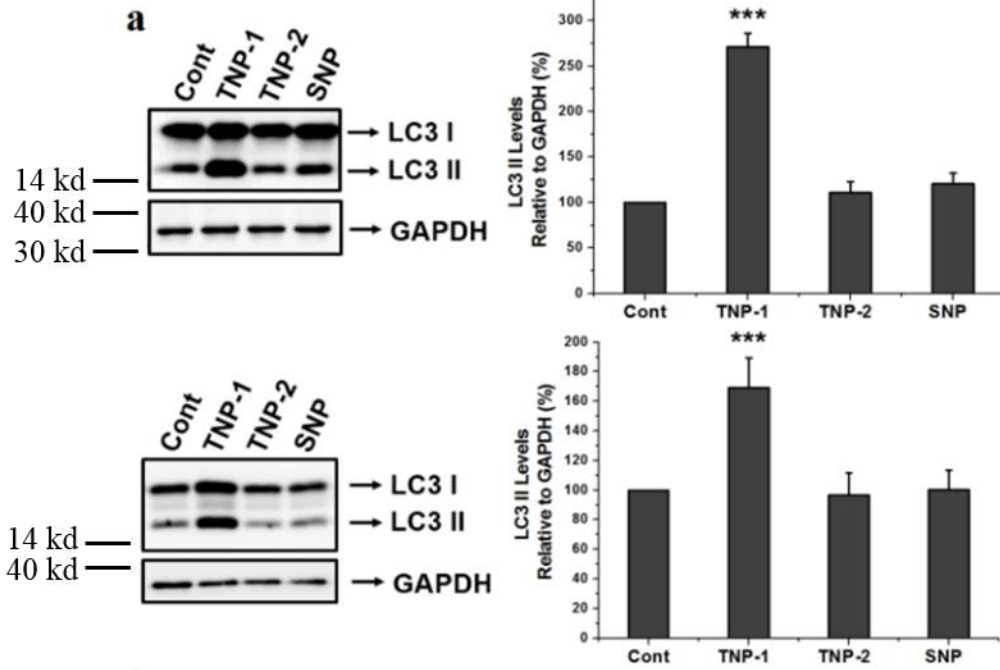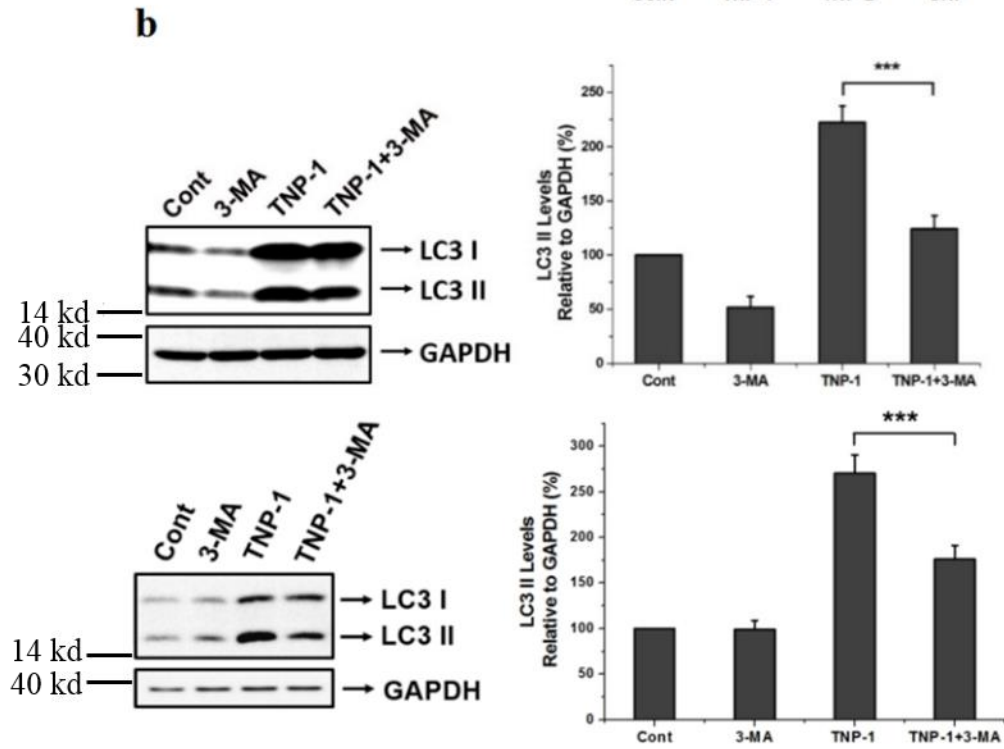

**Supplementary Figure 10. (a)** Western blotting of LC3 and GAPDH (served as loading control) in 4T1 (top panel) and MCF-7/MDR (bottom panel) cells treated with 10 ug/mL CuPd TNP-1, CuPd TNP-2 or SNPs for 24 h. **(b)**Western blotting of LC3 and GAPDH (served as loading control) in 4T1 (top panel) and MCF-7/MDR (bottom panel) cells treated with 10 µg/mL CuPd TNP-1 for 24 h in the presence or absence of 3-MA. Endogenous LC3-II levels were detected by Western blotting with anti-LC3 antibodies and quantified by densitometric analysis relative to GAPDH. Mean ± s.e.m. n = 3. \*\*\*p < 0.001.

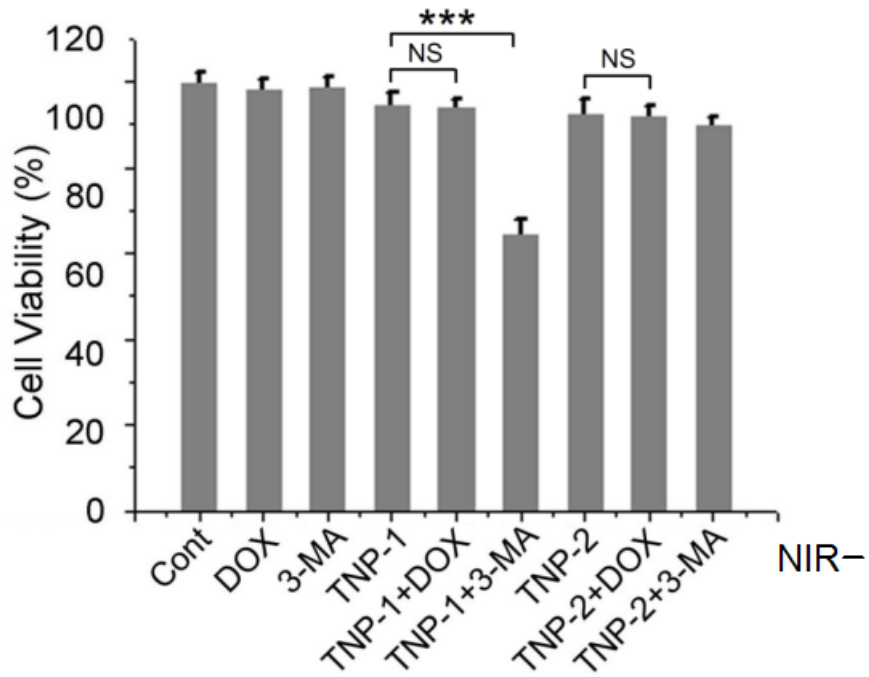

**Supplementary Figure 11.** Cell viability of MCF-7/MDR cells after treatment for 24 h with the indicated combination. Dosing used: TNP-1 or TNP-2: 10  $\mu\text{g}/\text{mL}$ ; 3-MA: 2.5 mM; Dox, 25  $\mu\text{M}$ . Mean  $\pm$  s.e.m. n =5, \*\*\*p < 0.001, NS: not significant.

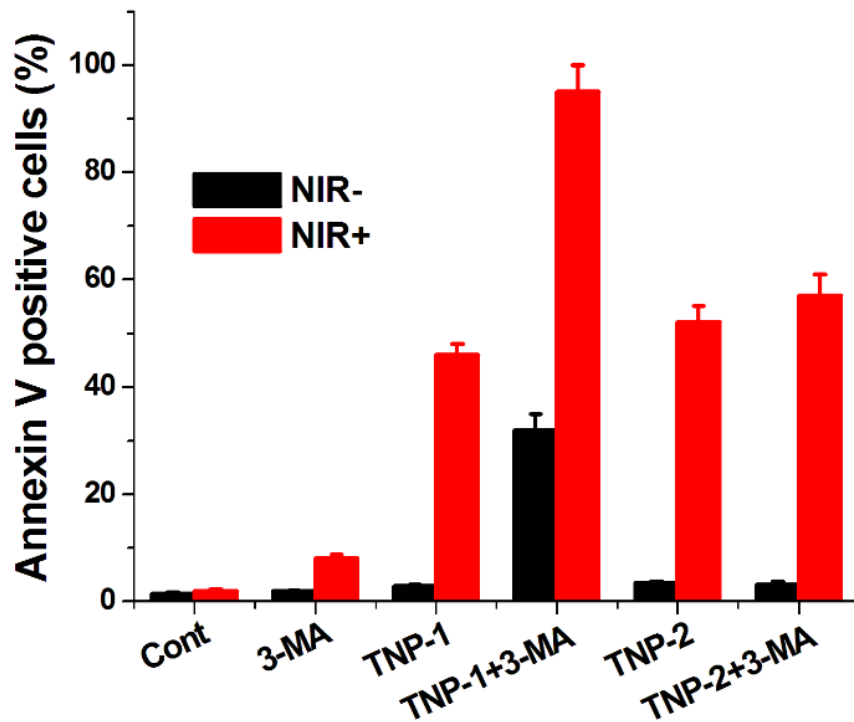

**Supplementary Figure 12.** Annexin-V/PI assay of 4T1 cells after the indicated treatment for 24 h. Dosing: 10  $\mu\text{g}/\text{mL}$  CuPd TNP-1 or TNP-2; 2.5 mM 3-MA; Irradiation by 808 nm NIR laser at a power density of 1  $\text{W}/\text{cm}^2$  for 3 min. The ratio of Annexin-V positive cells was quantified by FACS analysis.

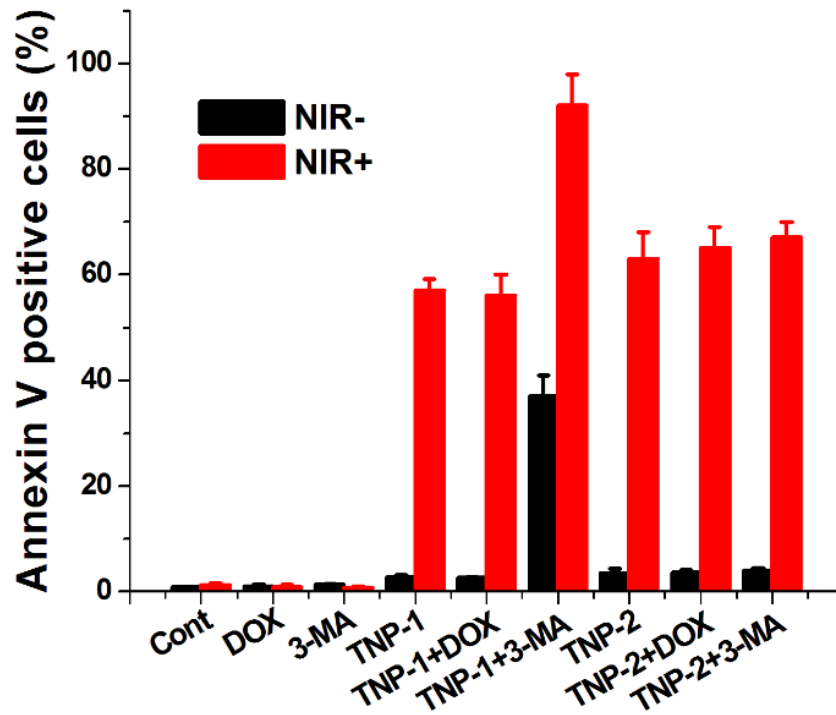

**Supplementary Figure 13.** Annexin-V/PI assay of MCF-7/MDR cells treated as indicated for 24 h. Dosing: 10  $\mu\text{g}/\text{mL}$  CuPd TNPs; 2.5 mM 3-MA; 20  $\mu\text{M}$  DOX; irradiation by 808-nm NIR laser at a power density of 1  $\text{W}/\text{cm}^2$  for 3 min. The ratio of Annexin-V positive cells was quantified by FACS analysis.

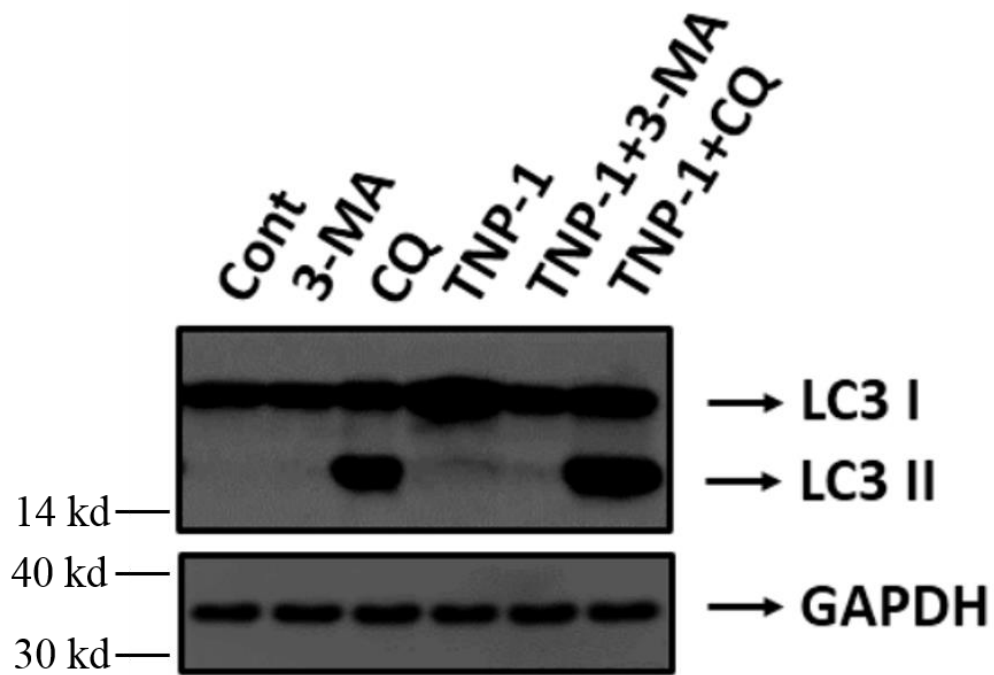

**Supplementary Figure 14.** Tumor cells derived from the gastric cancer patient were treated with 10  $\mu\text{g}/\text{mL}$  CuPd TNP-1 for 24 h in the presence or absence of 3-MA and CQ and subject to Western blotting with antibodies against LC3 and GAPDH (served as loading control).



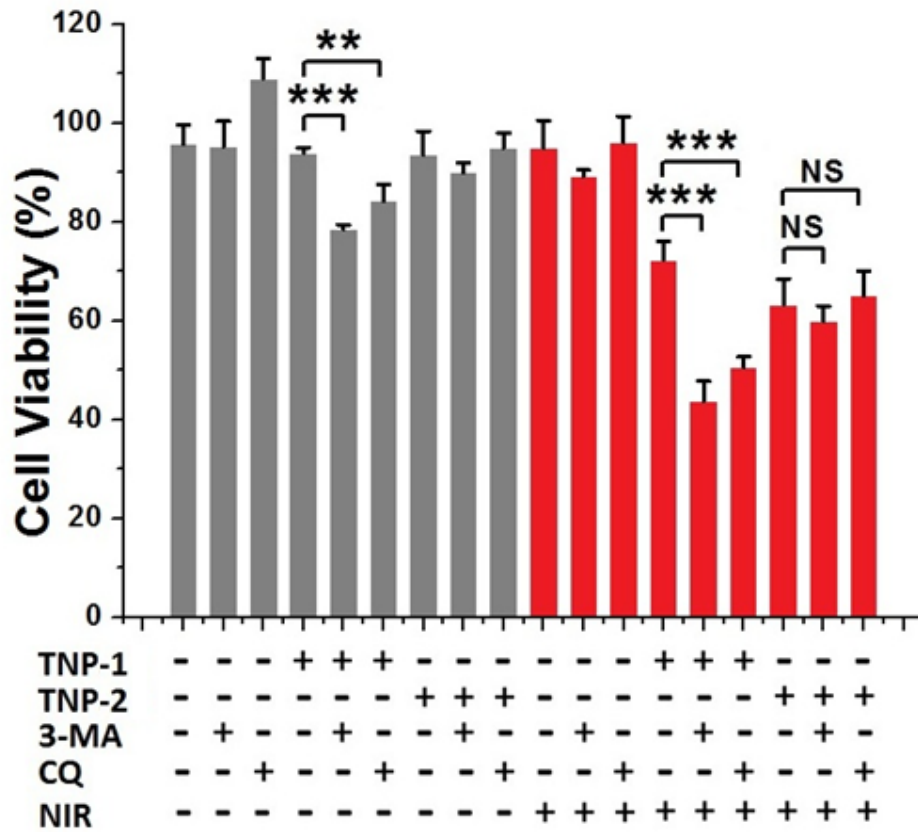

**Supplementary Figure 15.** Cell viability of tumor cells derived from the gastric cancer patient after the indicated treatment for 24 h. Dosing: 10  $\mu\text{g}/\text{mL}$  CuPd TNP-1 or TNP-2; 2.5 mM 3-MA; 25 mM CQ; Irradiation by 808-nm NIR laser at a power density of 1  $\text{W}/\text{cm}^2$  for 3 min. Mean  $\pm$  s.e.m. n = 5, \*\*p < 0.01, \*\*\*p < 0.001, NS: not significant.

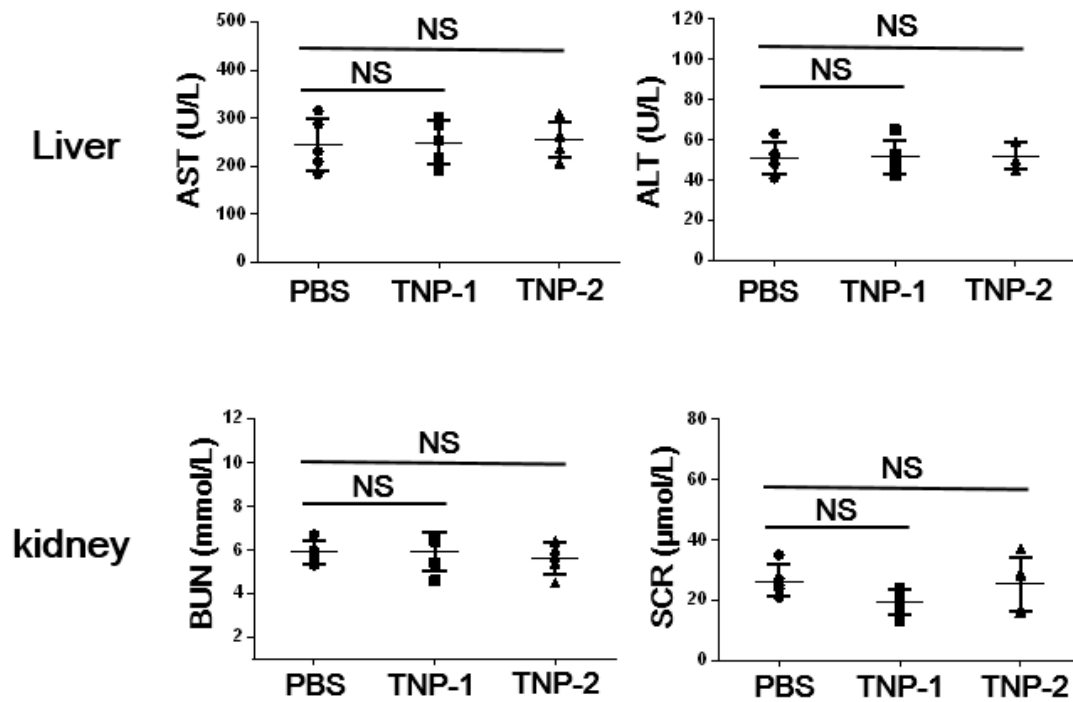

**Supplementary Figure 16.** Levels of liver ALT (Alanine aminotransferase) and AST (Aspartate aminotransferase) and kidney BUN (Blood urea nitrogen) and SCR (Serum creatinine) in Balb/c mice after treatment with PBS, 1.5 mg/kg TNP-1 or 1.5 mg/kg TNP-2 for 24 h. Mean  $\pm$  s.e.m. n=5. NS: not significant.

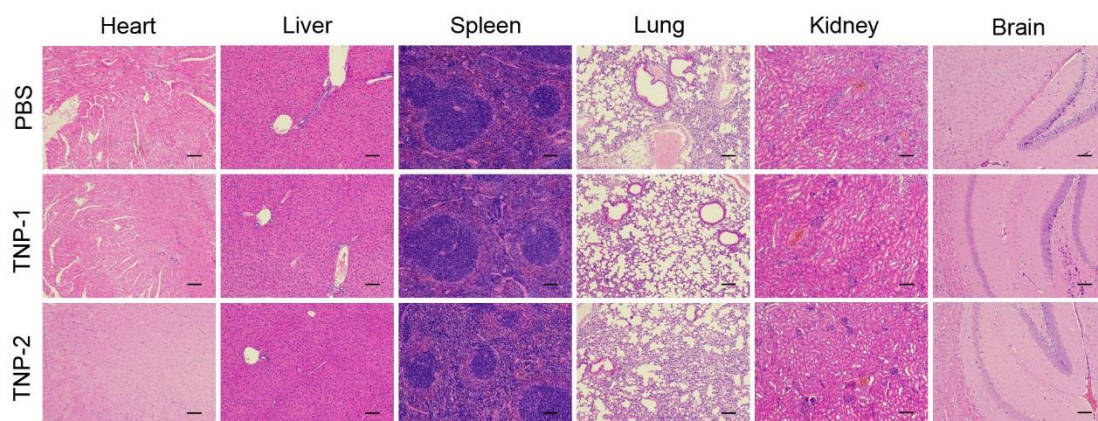

**Supplementary Figure 17.** Hematoxylin & eosin (H&E) staining of the major organs of Balb/c mice after treatment with PBS, 1.5 mg/kg TNP-1 or 1.5 mg/kg TNP-2 for 24 h. Scale bar: 100  $\mu$ m.

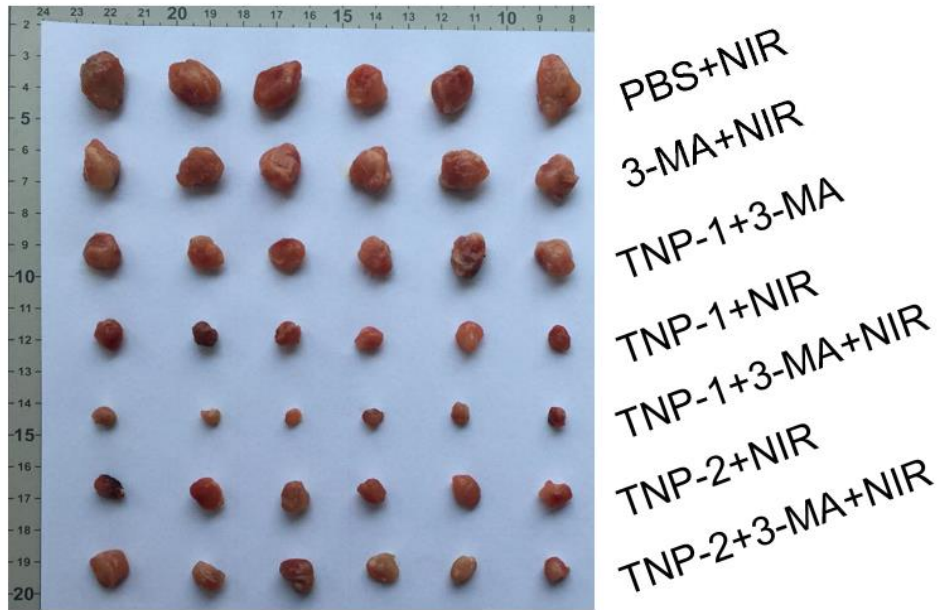

**Supplementary Figure 18.** Photographs of the excised tumors after the 7-day PTT treatment regimen in the orthotopic 4T1 breast cancer model. Dosing used: 100  $\mu\text{mol/kg}$  3-MA, 1.5 mg/kg TNP-1 or TNP-2.

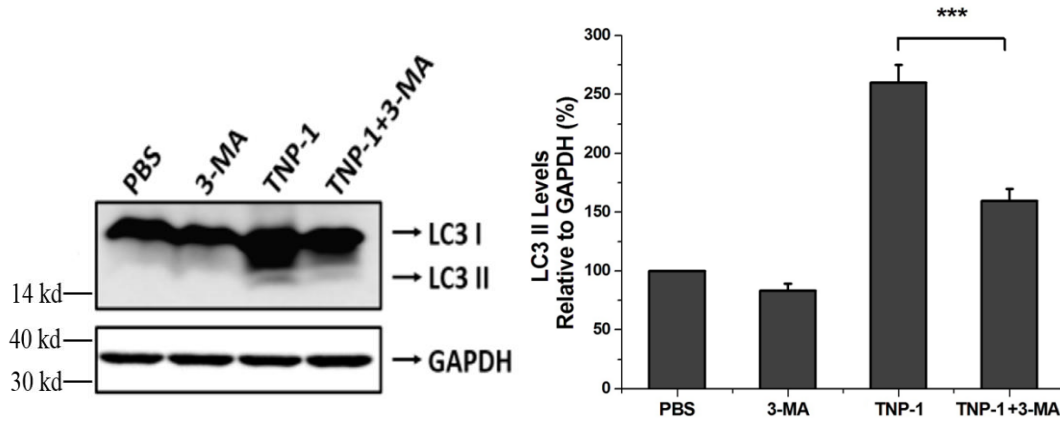

**Supplementary Figure 19.** Tumor tissues from the 4T1 tumor-bearing mice after the indicated PTT treatment were subjected to Western blotting with antibodies against LC3 and GAPDH. Dosing used: 100  $\mu$ mol/kg 3-MA and 1.5 mg/kg TNP-1. The right panel showed the quantified results. Mean  $\pm$  s.e.m. n = 3. \*\*\*p < 0.001.

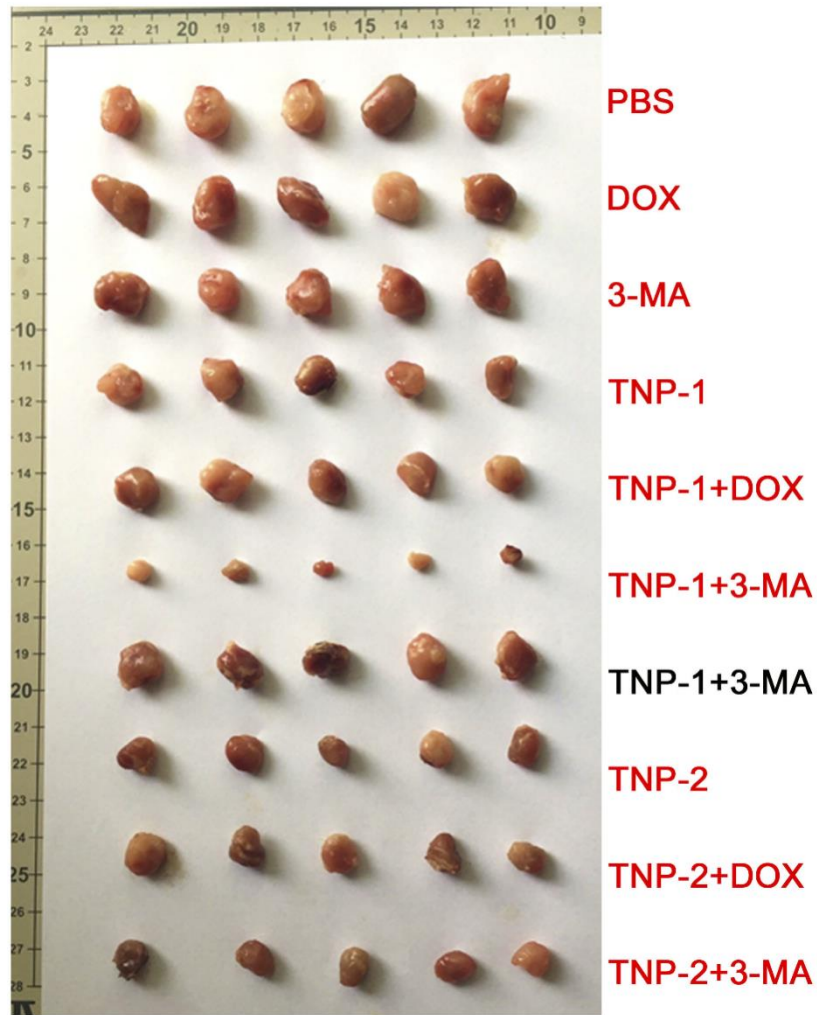

**Supplementary Figure 20.** Photographs of the excised tumors after the 7-day PTT treatment regimen in the orthotopic MCF7/MDR breast cancer model. Treatments marked in red indicated NIR irradiation, while one group marked in black (TNP-1 + 3-MA) did not receive NIR irradiation. Dosing used: 5 mg/kg DOX; 100  $\mu$ mol/kg 3-MA, 1.5 mg/kg TNP-1 or TNP-2.

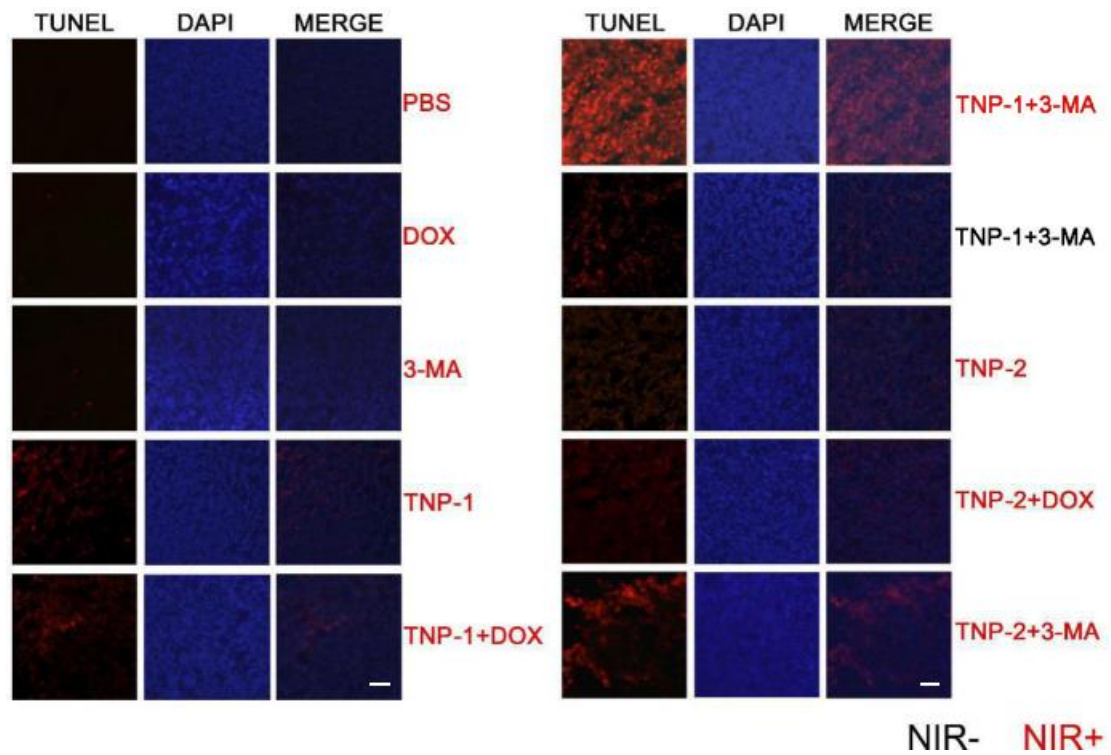

**Supplementary Figure 21.** TUNEL staining (red) of sections from tumors in  
 Supplementary Figure 20 was performed to show apoptotic cells. Nucleus was stained  
 with DAPI (blue). Scale bar, 50  $\mu$ m.

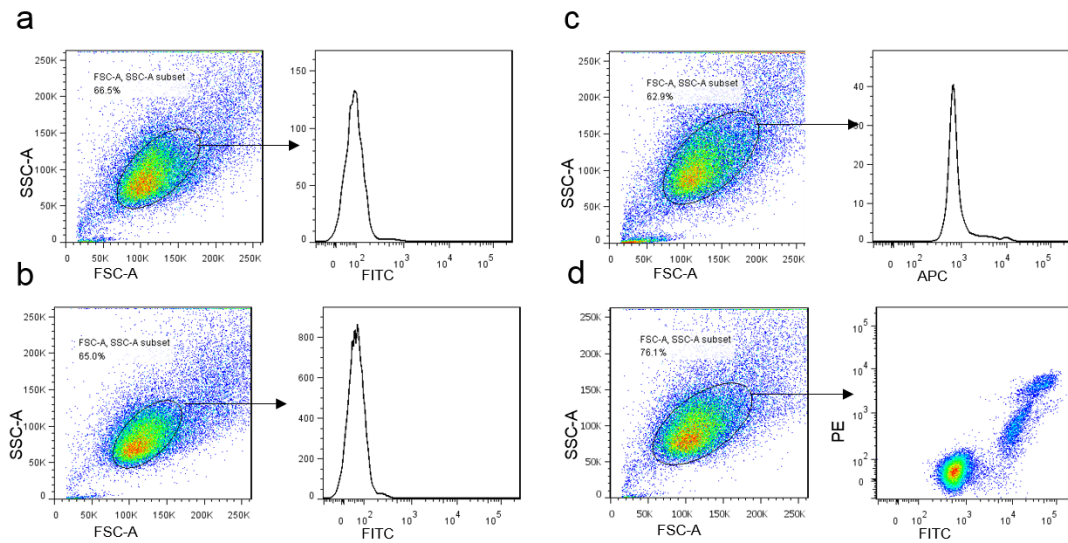

**Supplementary Figure 22.** Gating strategies for FACS. (a) Starting cells were gated by FSC/SSC gates. Representative histogram plots from Fig.3 a,b showing DCFH-DA staining for HeLa cells. (b) Starting cells were gated by FSC/SSC gates. Representative histogram plots from Fig. 3f showing LysoSensor Green DND-189 staining for HeLa cells. (c) Starting cells were gated by FSC/SSC gates. Representative histogram plots from Fig. 3g showing Magic Red Cathepsin-B staining for HeLa cells. (d) Starting cells were gated by FSC/SSC gates. Representative histogram plots from Fig. 4b showing Annexin -V- FLUOS and Annexin -V- Alexa 568 staining for HeLa cells.



Figure 2b

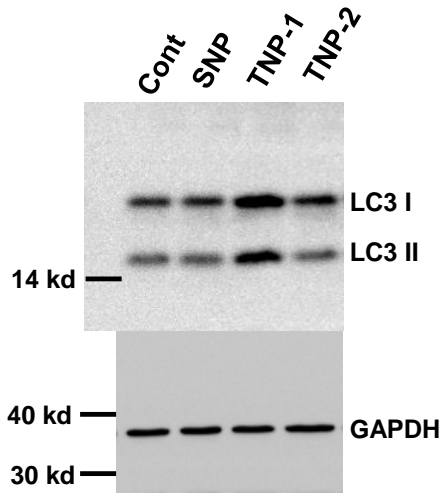

Figure 2d

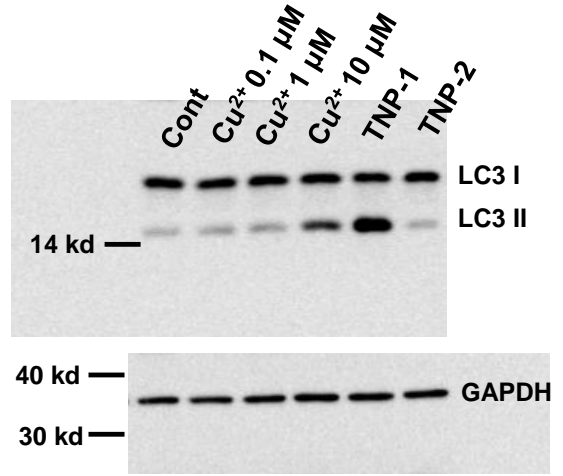

Figure 2e

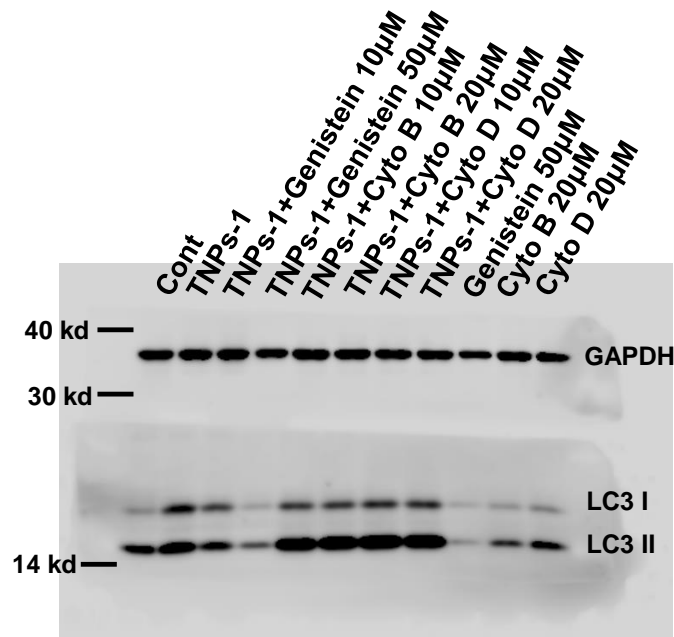

Figure 3c

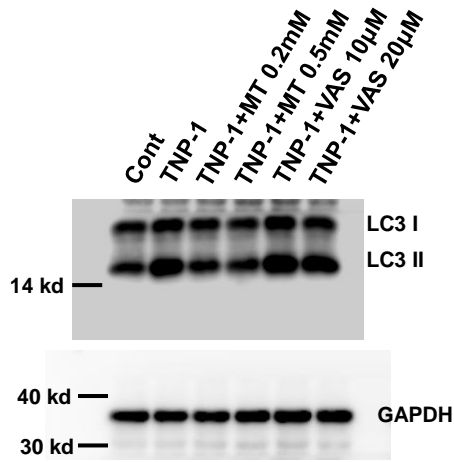

Figure 3d

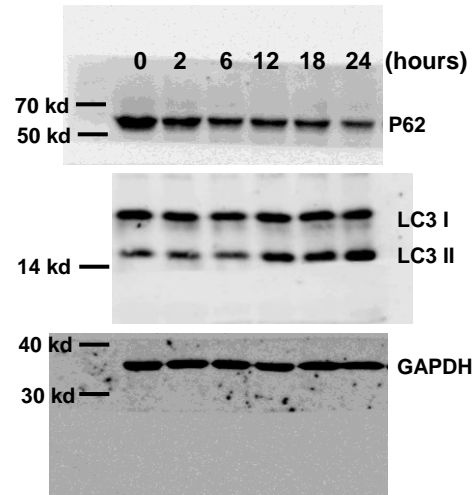

Figure 3e

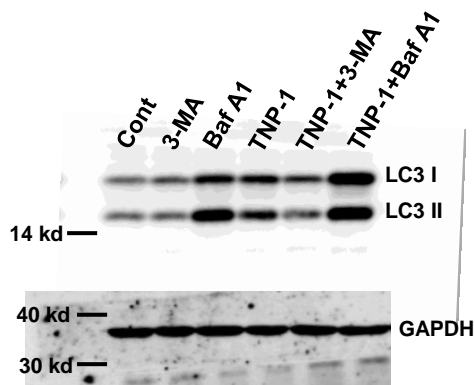

Figure 4g

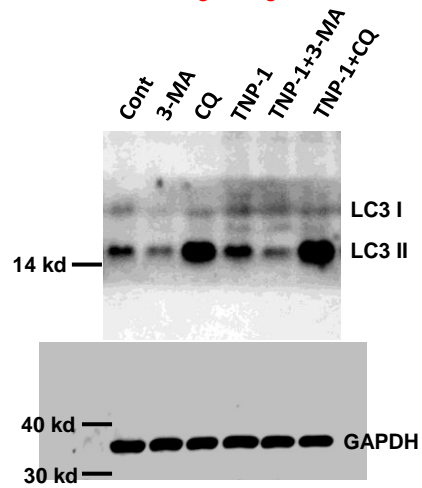

**Supplementary Figure 23.** Uncropped scans of Western blot with molecularweight markers. Related figure is indicated in red.

**Supplementary Table 1.**

| <b>Sample</b>  | <b>Viable cells</b> | <b>Early apoptotic cells</b> | <b>Late apoptotic cells</b> | <b>Necrotic cells</b> |
|----------------|---------------------|------------------------------|-----------------------------|-----------------------|
| Cont           | 97.7±0.2            | 0.7±0.1                      | 1.4±0.6                     | 0.2±0.1               |
| 3-MA           | 96.1±0.2            | 1.4±0.6                      | 2.3±0.3                     | 0.9±0.1               |
| TNP-1          | 97.3±0.1            | 0.9±0.6                      | 1.7±0.2                     | 0.2±0.1               |
| TNP-1+3-MA     | 67.0±0.5            | 1.7±0.3                      | 28.7±0.4                    | 2.6±0.4               |
| TNP-2          | 96.4±0.2            | 0.9±0.1                      | 2.1±0.5                     | 0.5±0.4               |
| NIR            | 97.4±0.2            | 0.9±0.1                      | 1.6±0.4                     | 0.1±0.1               |
| 3-MA+NIR       | 84.5±0.2            | 2.2±0.1                      | 11.4±0.6                    | 2.4±0.5               |
| TNP-1+NIR      | 65.2±0.8            | 1.7±0.2                      | 30.4±0.3                    | 2.9±0.1               |
| TNP-1+3-MA+NIR | 1.0±0.4             | 0.8±0.5                      | 91.6±0.3                    | 6.7±0.3               |
| TNP-2+NIR      | 43.5±0.5            | 9.3±0.2                      | 39.9±0.2                    | 7.4±0.2               |

**Supplementary Table 1. Summarized data for the Annexin-V/PI assay of HeLa cells after treatment for 24 hour with the indicated combination, showing the relative percentage of cells. TNP-1 or TNP-2: 10  $\mu\text{g mL}^{-1}$ ; 3-MA: 2.5 mM; NIR irradiation: 1 W  $\text{cm}^2^{-1}$ , 3 min.**

**Supplementary Table 2.**

| Cells               | Sample    | Viable cells | Early apoptotic cells | Late apoptotic cells | Necrotic cells |
|---------------------|-----------|--------------|-----------------------|----------------------|----------------|
| ATG5 <sup>+/+</sup> | Cont      | 93.2±0.3     | 1.4±0.6               | 5.4±0.2              | 0.1±0.1        |
|                     | Cont+NIR  | 89.3±0.4     | 1.7±0.2               | 8.9±0.6              | 0.1±0.1        |
|                     | TNP-1     | 87.5±0.2     | 2.0±0.4               | 10.3±0.5             | 0.2±0.2        |
|                     | TNP-1+NIR | 54.6±0.7     | 3.5±0.1               | 41.7±0.4             | 0.1±0.2        |
| ATG5 <sup>-/-</sup> | Cont      | 92.3±0.2     | 2.3±0.3               | 5.5±0.4              | 0.1±0.0        |
|                     | Cont+NIR  | 81.7±0.5     | 3.0±0.2               | 15.0±0.6             | 0.3±0.1        |
|                     | TNP-1     | 55.6±0.4     | 1.8±0.1               | 42.5±0.5             | 0.1±0.3        |
|                     | TNP-1+NIR | 2.0±0.4      | 1.4±0.3               | 89.3±0.6             | 7.3±0.4        |

**Supplementary Table 2. Summarized data for the Annexin-V/PI assay of wild-type and *ATG5* knockout (*ATG5*<sup>-/-</sup>) HeLa cells after treatment for 24 h with the indicated combination, showing the relative percentage of cells. TNP-1 or TNP-2: 10 µg mL<sup>-1</sup>; NIR irradiation: 1 W cm<sup>2</sup><sup>-1</sup>, 3 min. Mean ± s.e.m. n = 5.**

**Supplementary Table 3. Pharmacokinetic parameters of TNP-1 and TNP-2 after intravenous administration (Mean  $\pm$  s.e.m. n = 5).**

|          | T1/2           | AUC(0-24 h) <sup>a</sup>              | C <sub>max</sub> <sup>b</sup> | MRT(0-24 h) <sup>c</sup> |
|----------|----------------|---------------------------------------|-------------------------------|--------------------------|
|          | (h)            | ( $\mu\text{g L}^{-1}\cdot\text{h}$ ) | ( $\mu\text{g L}^{-1}$ )      | (h)                      |
| TNP-1/Pd | 73.5 $\pm$ 7.0 | 778.5 $\pm$ 50.4                      | 38.2 $\pm$ 2.6                | 12.2 $\pm$ 0.3           |
| TNP-2/Pd | 68.0 $\pm$ 4.2 | 761.8 $\pm$ 61.0                      | 43.0 $\pm$ 4.6                | 12.4 $\pm$ 0.3           |

<sup>a</sup>Area under the curve (AUC).

<sup>b</sup>The maximum drug concentration (C<sub>max</sub>).

<sup>c</sup>Mean residence time (MRT). All the pharmacokinetic parameters were analyzed according to a non-compartment model by DAS 3.0.
